1  
2  
3  
4  
5  
6  
7  
8  
9  
10  
11  
12  
13  
14

**TITLE PAGE**

**1. Title**

- A Multi-layer Perceptron Neural Network for Predicting the Osteoporosis in Women Using Physical Activity Factors

**2. Corresponding author:**

Jun-hee Kim (JH Kim), PhD, PT

Address: 1, Yeonsedae-gil, Maeji-ri, Heungeop-myeon, Wonju-si, Gangwon-do, 26493, Laboratory of KEMA AI Research (KAIR), Department of Physical Therapy, College of Software and Digital Healthcare Convergence, Yonsei University, Wonju, South Korea.

TEL: 82-33-760-2497 / FAX: 82-33-760-2496 / E-mail: [move@yonsei.ac.kr](mailto:move@yonsei.ac.kr)

15

## ABSTRACT

16 **Introduction:** Osteoporosis (OP) is a bone disease caused by a decrease in bone mineral density  
17 (BMD). OP is common in women because BMD gradually decreases after age 35. OP due to  
18 decreased BMD is highly likely to cause fatal traumatic injuries such as hip fracture. The purpose of  
19 this study was developed and evaluated a multi-layer perceptron neural network model that predicts  
20 OP using physical characteristics and activity factors of adult women over the age of 35 whose BMD  
21 begins to decline.

22 **Materials and Methods:** Data from KNHANES were used to develop a multi-layer perceptron model  
23 for predicting OP. Data preprocessing included variable selection and sample balancing, and LASSO  
24 was used for feature selection. The model used 5 hidden layers, dropout and batch normalization and  
25 was evaluated using evaluation scores such as accuracy and recall score calculated from a confusion  
26 matrix.

27 **Results:** Models were trained and evaluated to predict OP using selected features including age,  
28 quality of life index, weight, grip strength and average working hours per week. The model achieved  
29 76.8% accuracy, 74.5% precision, 80.5% recall, 77.4% F1 score, and 74.8% ROC AUC.

30 **Conclusion:** A multi-layer perceptron neural network for predicting OP diagnosis using physical  
31 characteristics and activity factors in women aged 35 years or older showed relatively good  
32 performance. Since the selected variables can be easily measured through surveys, assessment tool,  
33 and digital hand dynamometer, this model will be useful for screening elderly women with OP or not  
34 in areas with poor medical facilities or difficult access.

35

36 **Keywords:** Osteoporosis, predictive model, multi-layer perceptron, deep learning, physical activity

37

## 38 **Introduction**

39 Osteoporosis (OP) is a bone disease that occurs when bone mineral density (BMD) and bone mass  
40 decrease [1]. In other words, a decrease in BMD below a certain level is regarded as the onset of OP  
41 [1]. In women, rapid BMD and skeletal growth occur from menarche, when the secretion of sex  
42 steroids, including estrogen, increases [2]. BMD in adult women peaks between the ages of 25 and 35,  
43 after which women experience a gradual decline throughout their lives [2]. A decrease in BMD is  
44 prominent from menopause, when female hormones decrease, resulting in a higher rate of OP than in  
45 men [3, 4]. In particular, estrogen is thought to be important for maintaining BMD, and it has been  
46 reported that bone loss may occur as estrogen levels drop during menopause, resulting in a much  
47 higher rate of OP [5, 6].

48 Patients diagnosed with OP have a high risk of fracture due to trauma compared to normal people  
49 [7–9]. In particular, the femur, which makes up the hip joint, is a part where fractures commonly  
50 occur due to OP, and hip fracture can cause great difficulties in independent activities of daily life, and  
51 in severe cases, can be life threatening [10]. The 1-year mortality rate due to hip fracture increases by  
52 2% every year, and in the case of women, the 10-year mortality rate after hip fracture is reported to be  
53 16% [11]. In addition, once a fracture occurs, the risk of a second fracture increases more than twice,  
54 and when a second fracture occurs, the patient's mortality rate is much higher [12]. The mortality  
55 within 42 months after a second hip fracture was 57.2% [13]. Because the mortality rate of patients  
56 with hip fractures is high, it is important to predict or diagnose OP early to prevent hip fractures from  
57 occurring.

58 BMD is measured using dual energy X-ray absorptiometry (DXA) scans of the spine and hip to  
59 diagnose OP [14]. For postmenopausal women, BMD is determined by T-score compared to reference  
60 values of race- and sex-matched young adults [14]. However, one of the disadvantages of diagnosing  
61 OP through DXA scan is that measurement errors may occur due to surrounding soft tissue [15].  
62 Therefore, recently, studies applying machine learning such as deep learning to predict OP with high  
63 performance or to predict OP with a simpler X-ray imaging technique have been actively conducted.  
64 Learning hip radiographs and clinical data through deep learning can improve diagnostic performance

65 for OP classification and prediction even without using the DXA scans [16]. Similarly, diagnosis  
66 using deep learning based on lumbar radiographs had the potential to screen for OP and osteopenia  
67 even without using DXA scans [17]. In addition, The CT image-based deep learning diagnosis method  
68 showed higher accuracy and could output higher specificity or sensitivity for OP evaluation [18].

69 Deep learning models that predict OP using these medical diagnostic devices have been studied, but  
70 deep learning models that predict OP according to data that can be acquired without professional  
71 knowledge, such as physical characteristics or activity levels, have not been studied. Bone is an organ  
72 that continuously undergoes remodeling processes of resorption and formation, and BMD is formed  
73 by the balance of these processes [19]. According to the physical stress theory, bone can remain  
74 constant in an environment given an appropriate amount of stress [20]. In other words, factors that  
75 regulate stress on bones, such as physical activity, are important in controlling BMD [20]. Low  
76 activity level was considered a risk factor for OP, and vigorous physical activity such as strength  
77 training or aerobic exercise was recommended to prevent OP [21, 22]. However, despite the benefits  
78 of moderate loads for BMD, too much activity due to overtraining at elite sports levels can have  
79 negative consequences in BMD.[23] Moderate intensity physical activity may help prevent OP, but  
80 excessive intensity physical activity may increase the risk of OP [24, 25]. Therefore, data related to  
81 physical activity will be able to be trained through deep learning as factors for predicting OP.

82 The purpose of this study was to create a multi-layer perceptron neural network model that predicts  
83 the diagnosis of OP in adult women with a high risk of OP using physical characteristics and physical  
84 activity-related factors, and to evaluate the performance of the created multi-layer perceptron deep  
85 learning model.

86

87

## 88 **Materials and Methods**

### 89 1. Data Source

90 This study used data samples obtained from the 6th to 8th KNHANES (2015-2019), the national  
91 statistics of the Korea Disease Control and Prevention Agency. From a total of 39,759 data samples,  
92 data were extracted from women aged 35 years or older, the age at which bone density begins to  
93 decline. Data samples with missing values were excluded, and 11,929 samples were finally selected.  
94 The selected data samples were classified into 9915 data samples of normal subjects and 2014 data  
95 samples of subjects diagnosed with OP (Figure 1). This study was approved by the Public Institutional  
96 Review Board Designated by Ministry of Health and Welfare (approval number: P01-202303-01-003)

97

98 [Figure 1. Flowchart of the study]

99

### 100 2. Data Preprocessing and Feature Selection

101 The physical characteristics and activity variables of the subjects were extracted from the data for  
102 analysis. Age, weight, height, waist circumference, grip strength, body mass index, quality of life,  
103 average working hours per week, walking days per week, and strength training days per week were  
104 selected as continuous variables. Activity restriction, occupational activity, work-related moderate-  
105 intensity physical activity, work-related moderate-intensity physical activity, leisure-related high-  
106 intensity physical activity, leisure-related moderate-intensity physical activity, and weight change  
107 were selected as categorical variables (Table 1).

108 To address potential imbalances in the data between diagnosed osteoporosis (OP) and normal  
109 samples, a RandomUnderSampler function was used. This technique randomly selected an equivalent  
110 number of normal samples to match the number of OP samples. Additionally, continuous variables  
111 were scaled using the StandardScaler function, while categorical variables were transformed using  
112 one-hot encoding methods. These steps were taken to ensure that the data was prepared appropriately

113 for subsequent analysis. To avoid overfitting due to many variables, LASSO rules were used to select  
114 appropriate variables before generating the multi-layer perceptron model [26]. Alpha representing the  
115 degree of regularization was set at 0.01. After the data was preprocessed, it was split into two sets:  
116 train and test data. The ratio of the train data to the test data was 7:3. This division allowed for the  
117 model to be trained on a portion of the data and then tested on a separate set to evaluate its  
118 performance.

119

120 [Table 1. Description of Variables]

121

### 122 3. Multi-layer Perceptron Neural Network

123 A multi-layer perceptron is a distributed information processing structure composed of nodes. Each  
124 layer consists of one or more nodes. The input layer receives a signal from the outside and passes the  
125 output to the hidden layer through a weighted connection. It is then computed in the hidden layer and  
126 passed to the output layer to perform computations and generate predictions. The multi-layer  
127 perceptron model created in this study consists of one input layer, one output layer, and five hidden  
128 layers. The five layers consisted of 128, 64, 32, 16, and 8 nodes, respectively. The ReLU activation  
129 function was applied to the 5 hidden layers, and the sigmoid activation function was applied to the  
130 output layer to predict the OP. To prevent overfitting, the dropout ratio was set to 0.25 and batch  
131 normalization was performed. For the gradient descent algorithm to find the minimum loss function,  
132 Adam optimizer was used. The ratio of data split and used for validation while the model was being  
133 trained was 0.2. In order to reduce the learning time for building the model, the EarlyStopping  
134 function was used to terminate learning when the validation loss value did not improve for 20 epochs.

135

136 [Figure 2. Schematic diagram of multi-layer perceptron neural network]

137

138 4. Model evaluation

139 The model's performance was assessed by generating a confusion matrix using the test data, which  
140 classified the predicted class and the actual class as TP (true positive), FP (false positive), FN (false  
141 negative), and TN (true negative). The accuracy, precision, recall, F1-score, and ROC AUC were  
142 calculated from the confusion matrix to evaluate the model's overall performance.

143

144 **Results**

145 1. Feature Selection

146 The variables selected using LASSO regularization were age, quality of life index, weight, grip  
147 strength, and average working hours per week.

148

149 2. Multi-layer Perceptron Neural Network Model Training

150 The multi-layer perceptron neural network model created using the selected features showed the  
151 following accuracy and loss (Figure 3). Training of the model was completed at the 39th epoch. The  
152 average accuracy of the top 5 models built in the process of model training was 77.34%.

153

154 [Figure 3. Training accuracy and loss curve]

155

156

### 157 3. Model Performance

158 The accuracy score, which represents the number of correctly predicted data among the entire test  
159 data by the model composed of multi-layer perceptron layer neural networks, was 76.8%. The  
160 precision score for indicating actual OP among test data samples that were predicted to have OP was  
161 74.5%. The recall score representing the prediction of having an OP diagnosis among test data  
162 samples with an actual OP diagnosis was 80.5%. The F1 score, the harmonized mean of precision and  
163 recall, was 77.4%. The ROC AUC score, which indicates how well the multi-layer perceptron neural  
164 network model can classify each class, was 74.8%.

165

166 [Figure 4. Confusion matrix for osteoporosis prediction]

167

### 168 **Discussion**

169 In this study, a multi-layer perceptron neural network model was created using factors related to the  
170 physical characteristics of women over the age of 35 whose bone density begins to decrease. The  
171 factors selected to create the model included not only age, weight, and grip strength, but also the  
172 quality of life and average working hours per week. All the evaluation indicators evaluating the  
173 overall performance of the model created with the above factors exceeded 74%. Among the  
174 evaluations, the recall score, which means the sensitivity of OP diagnosis, exceeded 80%.

175 The factors selected to model of this study may have been related to BMD, which is the criterion  
176 for diagnosis of OP. Lee et al. [27] conducted a study on the relationship between BMD and age based  
177 on the 4th KNHANES survey data between 2008 and 2009, similar to the subjects in the data sample  
178 of this study. In this study, women's BMD was highest in the 10-19 year age group and declined at a  
179 rate of 0.66 to 1.08% per year until age 80 years [27]. Additionally, moderate physical stress can  
180 stimulate bone remodeling and increase density [28]. Therefore, factors related to physical stress, such  
181 as muscle strength and weight, appear to be related to BMD as factors that can be controlled, unlike  
182 factors such as age [28, 29]. Luo et al. [30] analyzed the relationship between grip strength and BMD



183 based on a sample of NHANES 2013–2014 survey data of Americans, adjusting for all other factors  
184 that could affect BMD, such as age, body mass index, use of female hormones, and physical activity.  
185 Grip strength has been shown to be associated with increased femoral neck and total lumbar spine  
186 BMD in premenopausal and postmenopausal women [30]. Kim et al. [31] conducted a study on the  
187 relationship between women's body weight and BMD.[31] In this study, they found a significant  
188 difference in weight between the abnormal group with a BMD T-score of less than -1 and the normal  
189 group with a T-score of -1 or greater. Additionally, a weak correlation existed between body weight  
190 and T-score, with each 1 kg increase in weight reducing the risk of abnormal BMD by 3.7%.[31]

191 The EQ-5D used to measure the quality of life variable is a tool to evaluate health-related quality of  
192 life at three levels for a total of five items: motor ability, self-management, daily life, pain and  
193 discomfort, and anxiety and depression [32]. In other words, the quality of life variable through the  
194 EQ-5D index can be seen as a variable that includes physical activity. The average working hours per  
195 week selected in the model of this study may be seen as a factor that quantitatively reflects the degree  
196 of physical activity [29, 33]. However, there is no study that directly conducted the relationship  
197 between working hours and OP, and rather, the results of other studies on the relationship between OP  
198 and work can refute this view. It has been hypothesized that endocrine disorders caused by night shifts  
199 may indirectly affect the bone physiology of night shift workers [34]. In addition, excessive physical  
200 activity may cause menstrual disorders in women, resulting in decreasing BMD [35]. Nevertheless,  
201 epidemiological evidence suggests that an active lifestyle through physical activity may reduce the  
202 incidence of osteoporotic hip fractures in the elderly population, suggesting that physical activity  
203 during working hours may be an important determinant of OP diagnosis [33, 36, 37].

204 Recently, models for determining OP, predicting T-score, or predicting BMD built using deep  
205 learning such as convolutional neural networks using CT and X-ray images have been proposed [38–  
206 40]. Yasaka et al. [38] built a model using 1665 CT images of 183 patients, predicted BMD values  
207 with a correlation coefficient of 0.84-0.85 with actual BMD values, and showed OP prediction  
208 performance of over 96%. Ho et al. [39] built a model with data collected through a total of 3472 pairs  
209 of pelvic X-ray and DXA examinations and predicted BMD values only with femur bone x-ray. The

210 predicted BMD value showed a correlation  $r$  value of 0.85 with the actual value, and OP diagnosis  
211 through the model showed an accuracy of 88% [39]. In addition, Sato et al. [40] constructed a model  
212 to predict T-score with chest x-ray, which is the most common, accessible, and inexpensive  
213 measurement. The correlation coefficient between the BMD value predicted by the model and the  
214 BMD value of the hip was 0.75, and the correlation coefficient of the BMD value of the lumbar spine  
215 was 0.63 [40]. ROC AUC score, a performance indicator of the model that classified normal,  
216 osteopenia, and OP by predicting T-score, was 0.89, 0.70, and 0.84, respectively [40]. The model  
217 constructed in our study did not predict the BMD value, and the predictive performance for OP was  
218 about 75-80%, which was relatively low compared to previous studies. Nevertheless, the advantage of  
219 this model in our study is that it can predict OP with simple physical factors without imaging  
220 techniques such as CT or X-ray. The variables for using this model were easily measurable by  
221 surveying, evaluation tool, digital hand dynamometer, and did not require very high skill.

222 There are several limitations to this study. First, in this study, since the model was created using  
223 only female data, it is inappropriate to use male data for OP prediction. Second, it is difficult to  
224 quantitatively describe the influence of variables for OP prediction because the hidden layer of the  
225 deep learning model makes it difficult to know the exact contribution of the variables to how they  
226 arrived at the OP prediction. Therefore, it is unclear whether OP can be prevented, or symptoms  
227 improved by controlling for the variables chosen to build this model. Future studies will need to  
228 update the model with additional data or variables to improve predictive performance or to build a  
229 model for the entire population, including males. Along with this, verification of the variables selected  
230 to build this model should be performed by adjusting the influence of other extrinsic variables.

231

232 **Conclusion**

233 In this study, a multi-layer perceptron neural network structure was created to predict the diagnosis  
234 of OP in women aged 35 years or older by using personal characteristics and physical factors as  
235 variables. The variables used to build the model were age, weight, grip strength, quality of life index,  
236 and average working hours per week, which could be easily measured through survey, assessment tool,  
237 and digital hand dynamometer. Therefore, our model will be of great help in performing OP screening  
238 without medical equipment in areas with poor medical facilities or elderly women who have difficulty  
239 accessing hospitals.

240

241

242

243 **References**

- 244 1. Lorentzon M, Cummings SR (2015) Osteoporosis: the evolution of a diagnosis. *J Intern Med*  
245 277:650–661
- 246 2. Clarke BL, Khosla S (2010) Female reproductive system and bone. *Arch Biochem Biophys*  
247 503:118–128
- 248 3. Bruno AG, Broe KE, Zhang X, et al (2014) Vertebral size, bone density, and strength in men  
249 and women matched for age and areal spine BMD. *J Bone Miner Res* 29:562–569
- 250 4. Khosla S, Melton III LJ, Atkinson EJ, et al (1998) Relationship of serum sex steroid levels and  
251 bone turnover markers with bone mineral density in men and women: a key role for  
252 bioavailable estrogen. *J Clin Endocrinol Metab* 83:2266–2274
- 253 5. Felson DT, Zhang Y, Hannan MT, et al (1993) The effect of postmenopausal estrogen therapy  
254 on bone density in elderly women. *N Engl J Med* 329:1141–1146
- 255 6. Papat VB, Calis KA, Vanderhoof VH, et al (2009) Bone mineral density in estrogen-deficient  
256 young women. *J Clin Endocrinol Metab* 94:2277–2283
- 257 7. Lu Y, Genant HK, Shepherd J, et al (2001) Classification of osteoporosis based on bone  
258 mineral densities. *J Bone Miner Res* 16:901–910
- 259 8. Marshall D, Johnell O, Wedel H (1996) Meta-analysis of how well measures of bone mineral  
260 density predict occurrence of osteoporotic fractures. *Bmj* 312:1254–1259
- 261 9. Seeman E (1994) Reduced bone density in women with fractures: contribution of low peak  
262 bone density and rapid bone loss. *Osteoporos Int* 4:S15–S25
- 263 10. Alarcón T, González-Montalvo JI, Gotor P, et al (2011) Activities of daily living after hip  
264 fracture: profile and rate of recovery during 2 years of follow-up. *Osteoporos Int* 22:1609–  
265 1613
- 266 11. Guzon-Illescas O, Perez Fernandez E, Crespí Villarias N, et al (2019) Mortality after

- 267 osteoporotic hip fracture: incidence, trends, and associated factors. *J Orthop Surg Res* 14:1–9
- 268 12. Omsland TK, Holvik K, Meyer HE, et al (2012) Hip fractures in Norway 1999–2008: time  
269 trends in total incidence and second hip fracture rates. A NOREPOS study. *Eur J Epidemiol*  
270 27:807–814
- 271 13. Solou K, Tyllianakis M, Kouzelis A, et al (2022) Morbidity and mortality after second hip  
272 fracture with and without nursing care program. *Cureus* 14:
- 273 14. Blake GM, Fogelman I (2007) The role of DXA bone density scans in the diagnosis and  
274 treatment of osteoporosis. *Postgrad Med J* 83:509–517
- 275 15. Lochmüller E-M, Krefting N, Bürklein D, et al (2001) Effect of fixation, soft-tissues, and scan  
276 projection on bone mineral measurements with dual energy X-ray absorptiometry (DXA).  
277 *Calcif Tissue Int* 68:
- 278 16. Yamamoto N, Sukegawa S, Kitamura A, et al (2020) Deep learning for osteoporosis  
279 classification using hip radiographs and patient clinical covariates. *Biomolecules* 10:1534
- 280 17. Zhang B, Yu K, Ning Z, et al (2020) Deep learning of lumbar spine X-ray for osteopenia and  
281 osteoporosis screening: A multicenter retrospective cohort study. *Bone* 140:115561
- 282 18. Pickhardt PJ, Nguyen T, Perez AA, et al (2022) Improved CT-based Osteoporosis Assessment  
283 with a Fully Automated Deep Learning Tool. *Radiol Artif Intell* 4:e220042
- 284 19. Manolagas SC (2000) Birth and death of bone cells: basic regulatory mechanisms and  
285 implications for the pathogenesis and treatment of osteoporosis. *Endocr Rev* 21:115–137
- 286 20. Mueller MJ, Maluf KS (2002) Tissue adaptation to physical stress: a proposed “Physical Stress  
287 Theory” to guide physical therapist practice, education, and research. *Phys Ther* 82:383–403
- 288 21. Sinaki M, Pfeifer M, Preisinger E, et al (2010) The role of exercise in the treatment of  
289 osteoporosis. *Curr Osteoporos Rep* 8:138–144
- 290 22. Schmitt NM, Schmitt J, Dören M (2009) The role of physical activity in the prevention of

- 291 osteoporosis in postmenopausal women—an update. *Maturitas* 63:34–38
- 292 23. Herbert AJ, Williams AG, Hennis PJ, et al (2019) The interactions of physical activity,  
293 exercise and genetics and their associations with bone mineral density: implications for injury  
294 risk in elite athletes. *Eur J Appl Physiol* 119:29–47
- 295 24. Wolman RL (1994) ABC of sports medicine: Osteoporosis and exercise. *BMJ* 309:400
- 296 25. Voss LA, Fadale PD, Hulstyn MJ (1998) Exercise-induced loss of bone density in athletes. *J*  
297 *Am Acad Orthop Surg Glob Res Rev* 6:349–357
- 298 26. Muthukrishnan R, Rohini R (2016) LASSO: A feature selection technique in predictive  
299 modeling for machine learning. In: 2016 IEEE international conference on advances in  
300 computer applications (ICACA). IEEE, pp 18–20
- 301 27. Lee EY, Kim D, Kim KM, et al (2012) Age-related bone mineral density patterns in Koreans  
302 (KNHANES IV). *J Clin Endocrinol Metab* 97:3310–3318
- 303 28. Morel J, Combe B, Francisco J, Bernard J (2001) Bone mineral density of 704 amateur  
304 sportsmen involved in different physical activities. *Osteoporos Int* 12:152–157
- 305 29. Cadore EL, Brentano MA, Krüel LFM (2005) Effects of the physical activity on the bone  
306 mineral density and bone remodeling. *Rev Bras Med do Esporte* 11:373–379
- 307 30. Luo Y, Jiang K, He M (2020) Association between grip strength and bone mineral density in  
308 general US population of NHANES 2013–2014. *Arch Osteoporos* 15:1–9
- 309 31. Kim SJ, Yang W-G, Cho E, Park E-C (2012) Relationship between weight, body mass index  
310 and bone mineral density of lumbar spine in women. *J bone Metab* 19:95–102
- 311 32. Devlin NJ, Brooks R (2017) EQ-5D and the EuroQol group: past, present and future. *Appl*  
312 *Health Econ Health Policy* 15:127–137
- 313 33. Düppe H, Gärdsell P, Johnell O, et al (1997) Bone mineral density, muscle strength and  
314 physical activity: a population-based study of 332 subjects aged 15–42 years. *Acta Orthop*

315 Scand 68:97–103

316 34. Bukowska-Damska A, Skowronska-Jozwiak E, Peplonska B (2019) Night shift work and  
317 osteoporosis: evidence and hypothesis. *Chronobiol Int* 36:171–180

318 35. Rutherford OM (1999) Is there a role for exercise in the prevention of osteoporotic fractures?  
319 *Br J Sports Med* 33:378–386

320 36. Jordan KM, Cooper C (2002) Epidemiology of osteoporosis. *Best Pract Res Clin Rheumatol*  
321 16:795–806

322 37. Nguyen T V, Sambrook PN, Eisman JA (1998) Bone loss, physical activity, and weight  
323 change in elderly women: the Dubbo Osteoporosis Epidemiology Study. *J bone Miner Res*  
324 13:1458–1467

325 38. Yasaka K, Akai H, Kunimatsu A, et al (2020) Prediction of bone mineral density from  
326 computed tomography: application of deep learning with a convolutional neural network. *Eur*  
327 *Radiol* 30:3549–3557

328 39. Ho C-S, Chen Y-P, Fan T-Y, et al (2021) Application of deep learning neural network in  
329 predicting bone mineral density from plain X-ray radiography. *Arch Osteoporos* 16:1–12

330 40. Sato Y, Yamamoto N, Inagaki N, et al (2022) Deep learning for bone mineral density and T-  
331 score prediction from chest X-rays: A multicenter study. *Biomedicines* 10:2323

332

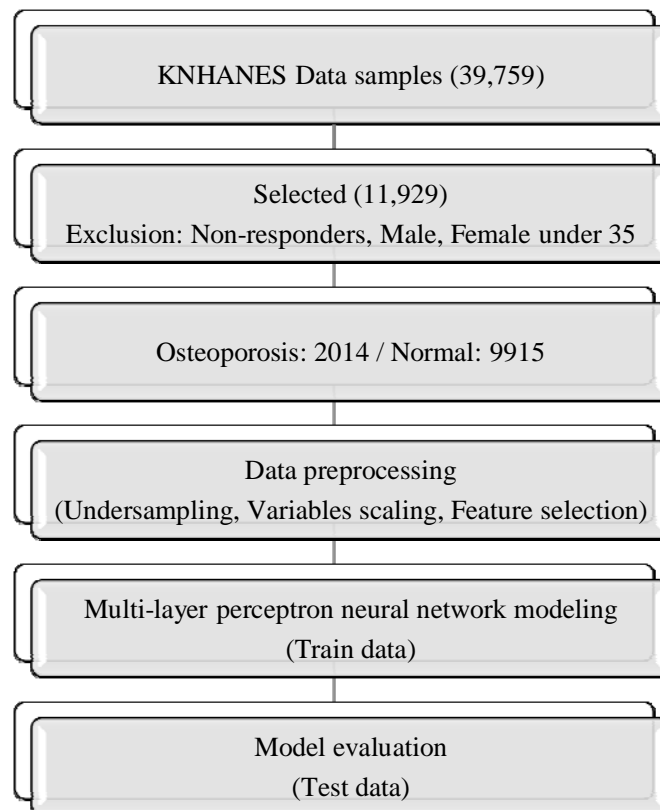

Figure 1. Flowchart of the study



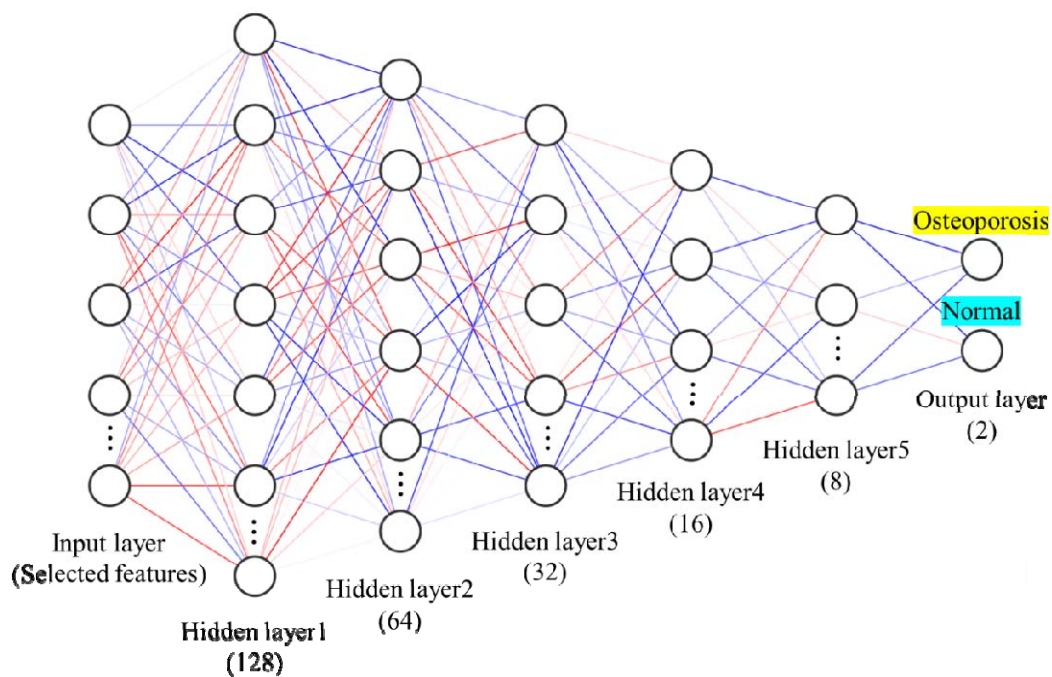

Figure 2. Schematic diagram of multi-layer perceptron neural network

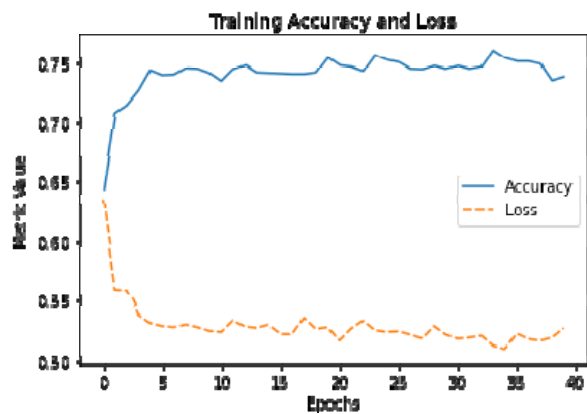

Figure 3. Training accuracy and loss curve

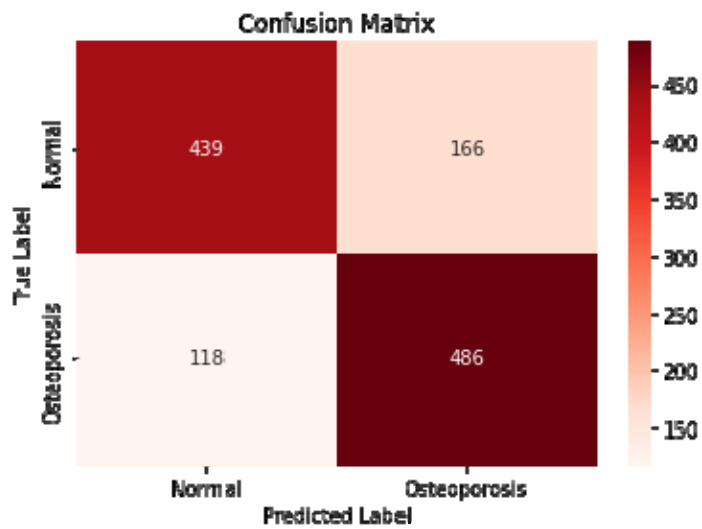

Figure 4. Confusion matrix for osteoporosis prediction

Table 1. Description of Variables

| <b>KNHANES</b> | <b>Description</b>                                   | <b>Osteoporosis</b>                        | <b>Normal</b>                                |
|----------------|------------------------------------------------------|--------------------------------------------|----------------------------------------------|
| Age            | Age                                                  | 68.69 ± 8.39                               | 54.75 ± 12.17                                |
| HE_wt          | Weight                                               | 55.88 ± 8.43                               | 58.91 ± 9.25                                 |
| HE_ht          | Height                                               | 152.77 ± 5.93                              | 157.12 ± 6.15                                |
| HE_wc          | Waist circumference                                  | 82.79 ± 9.26                               | 80.73 ± 9.59                                 |
| GS             | Grip strength                                        | 18.91 ± 5.03                               | 22.13 ± 5.13                                 |
| BMI            | Body mass index                                      | 23.93 ± 3.29                               | 23.87 ± 3.55                                 |
| EQ5D           | Quality of life                                      | 0.86 ± 0.16                                | 0.94 ± 0.11                                  |
| EC_wht_23      | Average working hours per week                       | 12.36 ± 19.79                              | 21.96 ± 22.37                                |
| BE3_31         | Walking days per week                                | 4.41 ± 2.72                                | 4.75 ± 2.6                                   |
| BE5_1          | Strength training days per week                      | 1.38 ± 1.17                                | 1.52 ± 1.31                                  |
| LQ4_00         | Activity restriction                                 | Yes: 410<br>No: 1604                       | Yes: 742<br>No: 9173                         |
| EC1_1          | Occupational activity                                | Yes: 673<br>No: 1341                       | Yes: 5328<br>No: 4587                        |
| BE3_71         | Work-related moderate-intensity physical activity    | Yes: 12<br>No: 2002                        | Yes: 53<br>No: 9862                          |
| BE3_81         | Work-related moderate-intensity physical activity,   | Yes: 77<br>No: 1937                        | Yes: 512<br>No: 9403                         |
| BE3_75         | Leisure-related high-intensity physical activity     | Yes: 30<br>No: 1984                        | Yes: 633<br>No: 9282                         |
| BE3_85         | Leisure-related moderate-intensity physical activity | Yes: 222<br>No: 1792                       | Yes: 2049<br>No: 7866                        |
| BO1_1          | Weight change                                        | No: 1420<br>Increase: 310<br>Decrease: 284 | No: 6318<br>Increase: 1094<br>Decrease: 2503 |
